# Supplementary material
Source: MDPI journal article supplement (https://www.mdpi.com/2071-1050/13/5/2893)
Supplement: s1 [file s1]

## Development of A spatial Model for Soil Quality Assessment under Arid and Semi-arid Conditions

Mohamed S. Shokr<sup>1</sup>, Mostafa. A. Abdellatif<sup>2</sup>, Ahmed A. El Baroudy<sup>1</sup>, Abdelrazek Elnashar<sup>3,4</sup>, Esmat F. Ali<sup>5</sup>, Abdelaziz A. Belal<sup>2</sup>, Wael. Attia<sup>2</sup>, Mukhtar Ahmed<sup>6,7</sup>, Ali A. Aldosari<sup>8</sup>, Zoltan Szantoi<sup>9,10</sup> and Ahmed M.S. Kheir<sup>11,\*</sup>

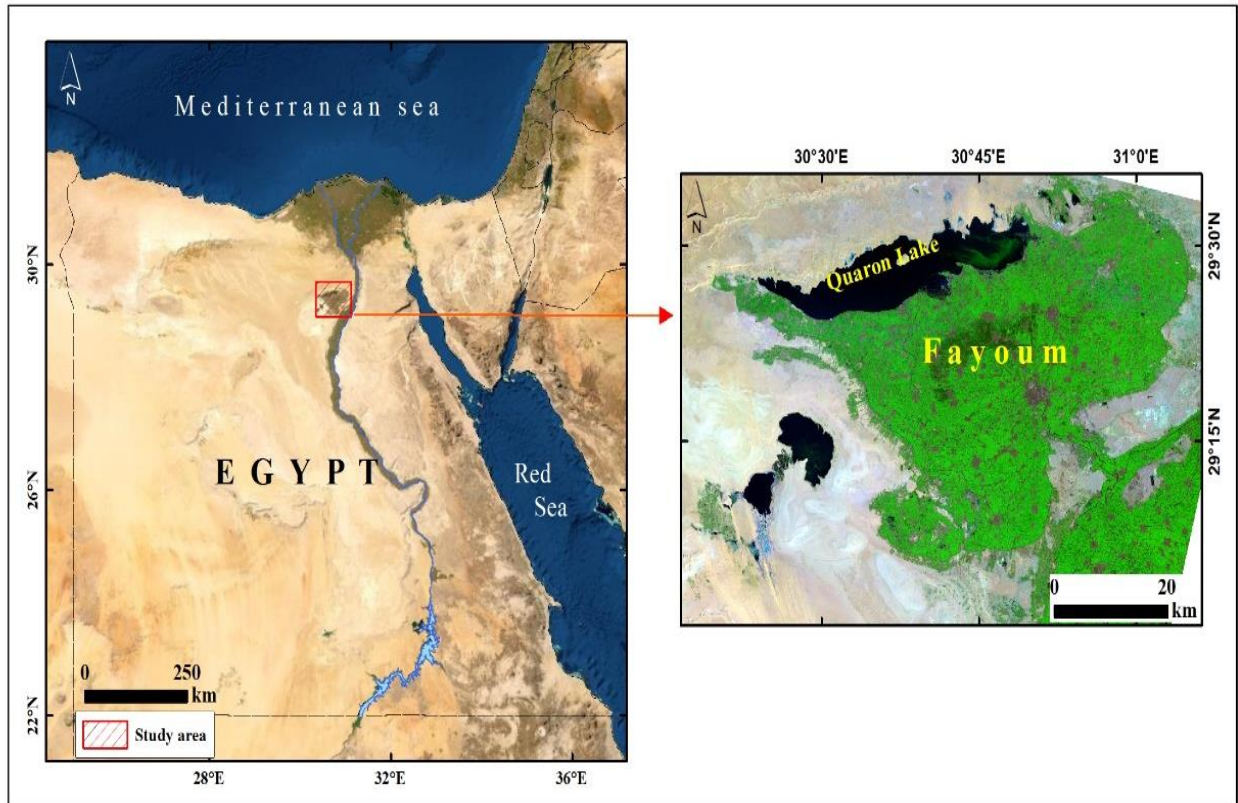

Figure S1. Egypt map (left) and the studied area (right).

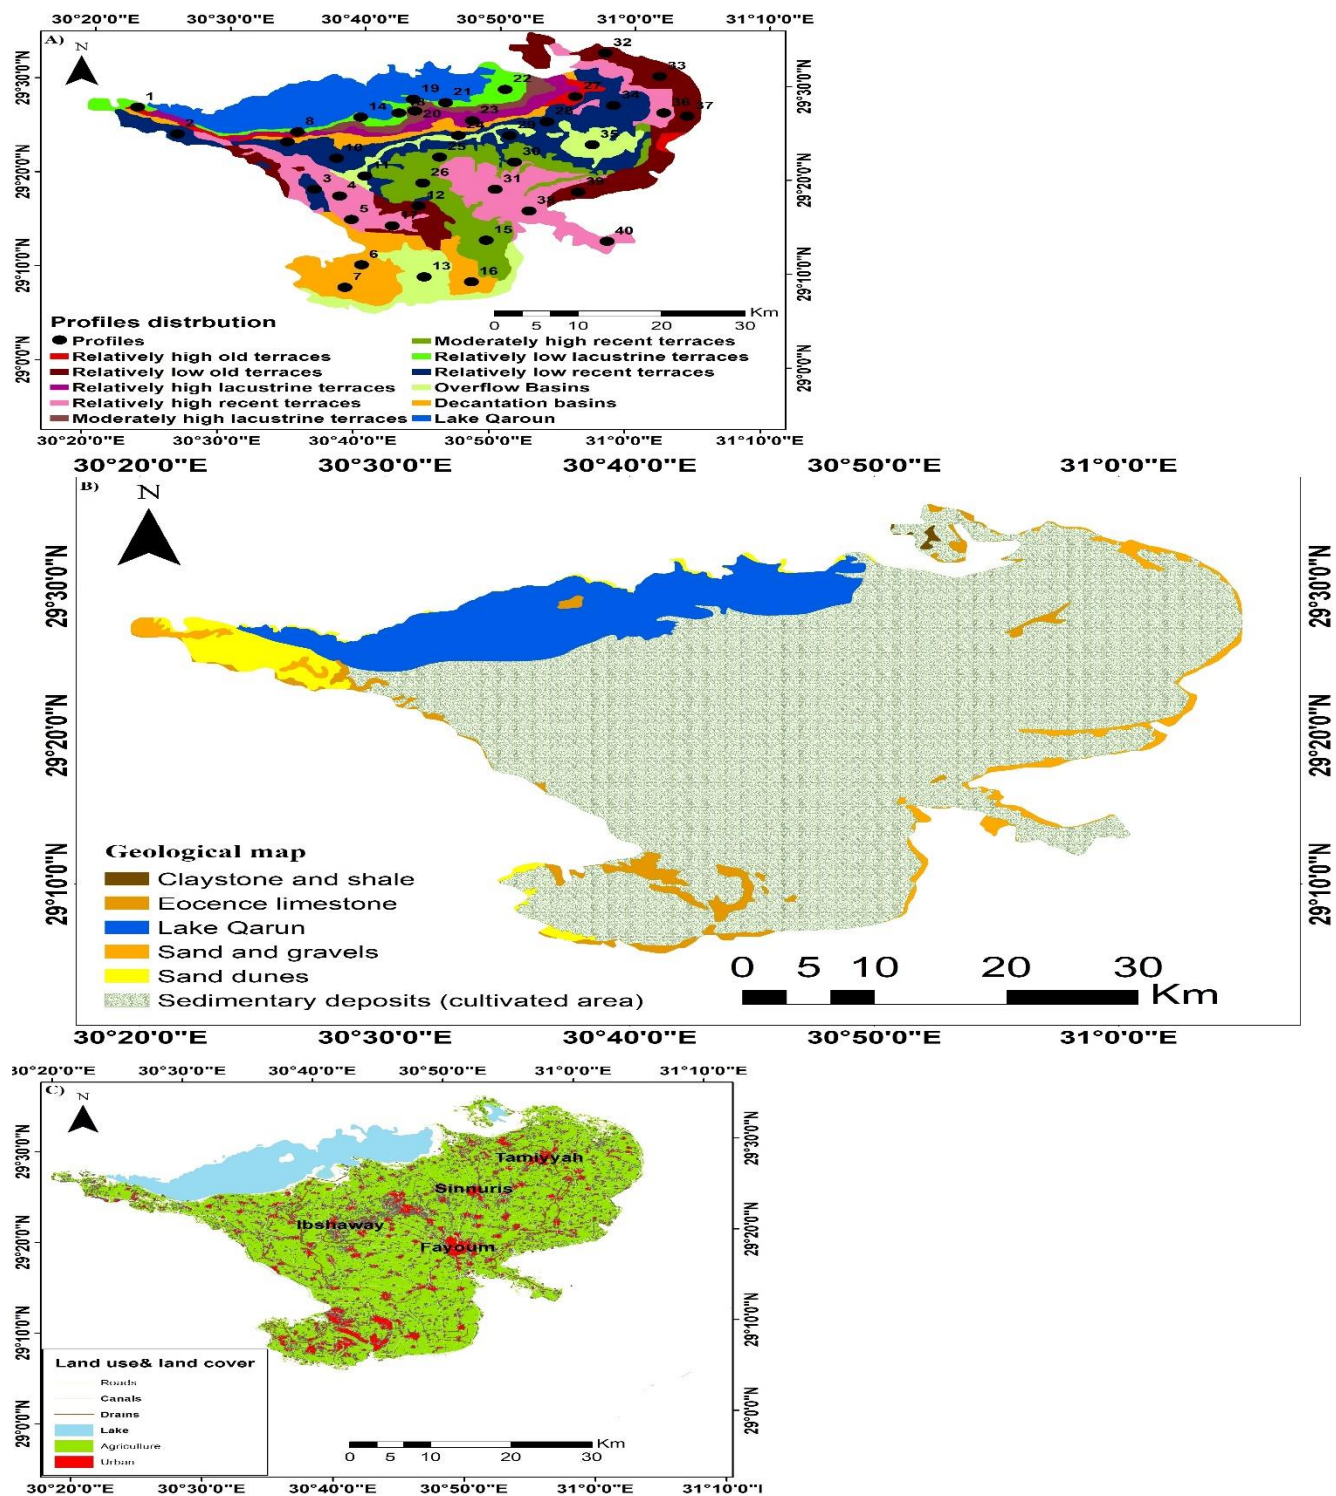

Figure S2. Map of sampling points to each landform (a), geological map (B), and land use map (C)

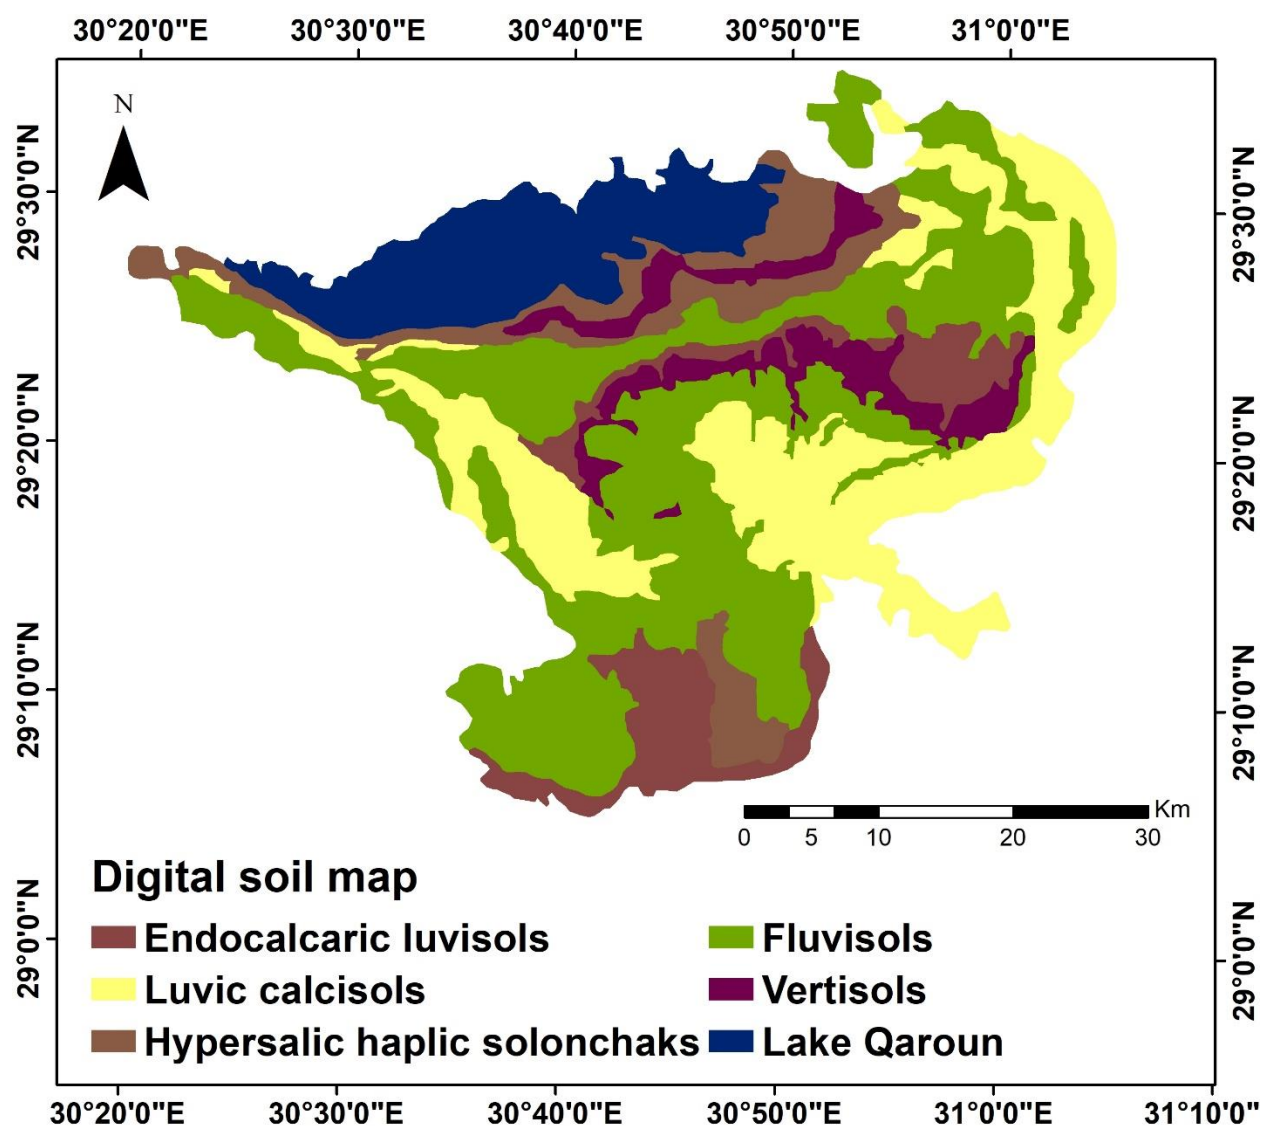

**Figure S3.** Digital soil map to show distribution of sub great groups of the study area based on WRB system.

**Table S1.** Classes and factors assigned weighting index affecting soil quality index in the study area according to MEDALUS methodology.

| Indicator    | Description     | Classes (threshold) | Unit | Index |
|--------------|-----------------|---------------------|------|-------|
| Soil texture | LS and SL       | 1                   |      | 1.0   |
|              | LC, CS,SC       | 2                   |      | 12    |
|              | C,CL            | 3                   |      | 1.6   |
|              | S to VS         | 4                   |      | 2.0   |
| Slop         | Gentle          | <6                  |      | 1.0   |
|              | Not very gentle | 6-18                | %    | 1.33  |
|              | Abrupt          | 19-35               |      | 1.66  |
|              | Very abrupt     | >35                 |      | 2.0   |
| Soil depth   | Very deep       | >1                  |      | 1.0   |
|              | Moderately deep | <1 to 0.5           | m    | 1.33  |
|              | Shallow         | <0.5 to 0.25        |      | 1.66  |
|              | Very shallow    | <0.15               |      | 2.00  |
| Drainage     | Well            | 1                   |      | 1.0   |
|              | Moderate        | 2                   |      | 1.2   |
|              | Poor            | 3                   |      | 2     |
|              | Non- calcareous | <5                  |      | 1.0   |
| CaCO3        | Slightly        | 5-10                | %    | 1.20  |
|              | Moderately      | 10-20               |      | 1.50  |
|              | Strongly        | >20                 |      | 2.00  |
|              | Very good       | >3                  |      | 1.00  |
| OM           | Good            | 2-3                 |      | 1.02  |
|              | Moderate        | 1-2                 | %    | 1.50  |
|              | Poor            | 0.5-1               |      | 1.70  |
|              | Very poor       | <1%                 |      | 2     |
| EC           | Very low        | <4                  |      | 1.00  |
|              | Low             | 4-8                 |      | 1.20  |
|              | Moderately      | 8-16                | dS/m | 1.50  |
|              | Moderately high | 16-32               |      | 1.70  |
|              | High            | >32                 |      | 2.00  |

LS= Loamy sand, SL= Sandy loam, LC= Loamy clay, CS= Clayey sand, SC= Sandy clay, C=clay, CL= Clay loam, S= Sand and VS= Very sand, m = meter, dS/m=Decisemens per meter, % = percentage

**Table S2.** The rate of Soil quality index of study area extracted from developed spatial model in GIS.

| <b>Soil quality</b>       | <b>Rating</b> |
|---------------------------|---------------|
| Very high quality         | 0.7 – 1       |
| High quality              | 1.1 - 1.25    |
| Slightly moderate quality | 1.26 - 1.46   |
| Moderate quality          | 1.47 – 2      |
| Low quality               | 2.1 - 2.44    |
| Very low quality          | 2.45 – 3      |

**Table S3.** Physiographic units of study area.

| Landscape                     | lithology                        | Relief                              | Landform                               | Area<br>Km² | %     |
|-------------------------------|----------------------------------|-------------------------------------|----------------------------------------|-------------|-------|
| Fluvial - lacustrine<br>plain | Alluvial- lacustrine<br>deposits | Gently undulating                   | Relatively low old<br>terraces         | 264.94      | 15.51 |
|                               |                                  | Flat to almost flat                 | Relatively low recent<br>terraces      | 299.80      | 17.56 |
|                               |                                  |                                     | Relatively high recent<br>terraces     | 327.63      | 19.19 |
| Lacustrine plain              | Lacustrine deposits              | Flat to almost flat                 | Relatively low<br>lacustrine terraces  | 80.35       | 4.71  |
|                               |                                  |                                     | Relatively high<br>lacustrine terraces | 68          | 3.98  |
|                               |                                  |                                     | Moderately high<br>lacustrine terraces | 46.31       | 2.71  |
| Alluvial plain                | Alluvial deposits                | Almost flat to gently<br>undulating | Moderately high<br>recent terraces     | 216         | 12.65 |
|                               |                                  |                                     | Overflow Basins                        | 185.59      | 10.87 |
|                               |                                  |                                     | Decantation basins                     | 218.54      | 12.80 |
| Total                         |                                  |                                     |                                        | 1707.16     | 100   |

**Table S4.** Areas of soil capability of the study area.

| <b>Land capability index</b> | <b>Areas km2</b> | <b>Areas %</b> |
|------------------------------|------------------|----------------|
| C6                           | 231.87           | 13.50%         |
| C4                           | 291.94           | 17%            |
| C3                           | 767.39           | 44.94%         |
| C2                           | 416.07           | 24.40%         |

**Table S5.** Areas of soil quality of the study area.

| <b>Classes</b>            | <b>Areas km<sup>2</sup></b> | <b>% Areas</b> |
|---------------------------|-----------------------------|----------------|
| Very high quality         | 387.12                      | 22.67          |
| High quality              | 441.72                      | 25.87          |
| Moderate quality          | 208.57                      | 12.21          |
| Slightly moderate quality | 231.10                      | 13.50          |
| Low quality               | 232.97                      | 13.64          |
| Very low quality          | 205.81                      | 12.05          |
